# Supplementary figures and images for: Characterization of lipid bilayers adsorbed to functionalized air/water interfaces
Source: Royal Society of Chemistry journal article supplement (doi:10.1039/d2nr03334h), 2022-01-01

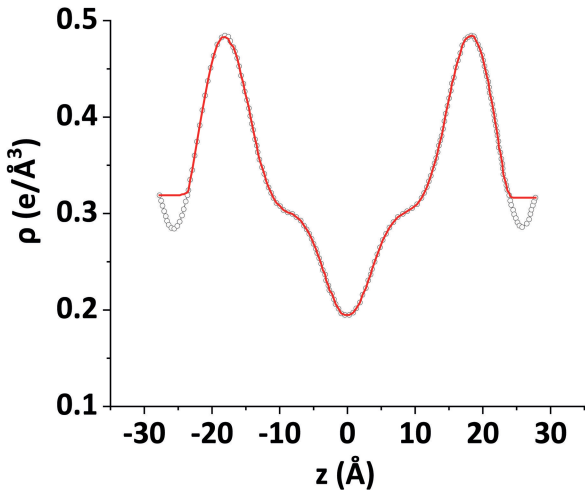

Supplement: d2nr03334h2.pdf [file d2nr03334h2.pdf]
